# Supplementary material
Source: MDPI journal article supplement (https://www.mdpi.com/2227-9040/10/5/176)
Supplement: s1 [file s1 › chemosensors-1690019-supplementary.pdf]

# Luminescent Self-Assembled Monolayer on Gold Nanoparticles: Tuning of Emission According to the Surface Curvature

Angela Candreva <sup>1,2</sup>, Giuseppe Di Maio <sup>1</sup>, Francesco Parisi <sup>1</sup>, Francesca Scarpelli <sup>1</sup>, Alessandra Crispini <sup>1</sup>, Nicolas Godbert <sup>1</sup>, Loredana Ricciardi <sup>2</sup>, Antonello Nucera <sup>3</sup>, Carmen Rizzuto <sup>3</sup>, Riccardo C. Barberi <sup>2,3</sup>, Marco Castriota <sup>2,3</sup> and Massimo La Deda <sup>1,2,\*</sup>

<sup>1</sup> Department of Chemistry and Chemical Technologies, University of Calabria, 87036 Rende, Italy; angela.candreva@unical.it (A.C.); giuseppe.dimaio@unical.it (G.D.M.); francesco.paris@unical.it (F.P.); francesca.scarpelli@unical.it (F.S.); a.crispini@unical.it (A.C.); nicolas.godbert@unical.it (N.G.)

<sup>2</sup> Institute of Nanotechnology (NANOTEC), National Research Council (CNR), UOS Cosenza, 87036 Rende, Italy; loredana.ricciardi@cnr.it (L.R.); riccardo.barberi@fis.unical.it (R.C.B.); marco.castriota@fis.unical.it (M.C.)

<sup>3</sup> Department of Physics, University of Calabria, 87036 Rende, Italy; antonello.nucera@unical.it (A.N.); carmen.rizzuto@unical.it (C.R.)

\* Correspondence: massimo.ladededa@unical.it

## Instrumental set-up and photophysical methods

Spectrofluorimetric grade solvents were used for the photophysical investigations in solution, at room temperature. Solid samples are prepared by placing microcrystalline powder between two quartz windows, and spectra have been recorded in an instrumental front-face geometry.

A Perkin Elmer Lambda 900 spectrophotometer was employed to obtain the absorption spectra.

Steady-state emission spectra were recorded on a HORIBA Jobin-Yvon Fluorolog-3 FL3-211 spectrometer equipped with a 450 W xenon arc lamp, double-grating excitation and single-grating emission monochromators (2.1 nm/mm dispersion; 1200 grooves/mm), and a Hamamatsu R928 photomultiplier tube. Emission spectra are confirmed by excitation ones. Emission and excitation spectra were corrected for source intensity (lamp and grating) and emission spectral response (detector and grating) by standard correction curves [9-11].

Time-resolved measurements were performed using the time-correlated single-photon counting (TCSPC) option on the Fluorolog 3. NanoLED at 265 nm, fwhm <1.0 ns with repetition rate at 1 MHz, was used to excite the sample. Excitation sources were mounted directly on the sample chamber at 90° to a single-grating emission monochromator (2.1 nm/mm dispersion; 1200 grooves/mm) and collected with a TBX-04-D single-photon-counting detector. The photons collected at the detector are correlated to the excitation pulse by a time-to-amplitude converter (TAC). Signals were collected using an IBH Data Station Hub photon-counting module, and data analysis was performed using the commercially available DAS6 software (HORIBA Jobin Yvon IBH). Goodness of fit was assessed by minimizing the reduced Chi squared function ( $\chi^2$ ) and visual inspection of the weighted residuals.

Emission quantum yields were determined using the optically dilute method on aerated solutions which absorbance at excitation wavelengths was < 0.1; 2-aminopyridine in ethanol was used as standard ( $\Phi = 0.37$ ) [12].

The experimental uncertainty on the molar extinction coefficients is 1%, while on the emission quantum yields is 5%. The examined compounds are fairly stable in solution, as demonstrated by the constancy of their absorption spectra over a week.

Micro-Raman spectra [13-16] were collected using a Horiba-Jobin Yvon [17] micro-probe apparatus with spectral resolution  $\sim 2$  cm<sup>-1</sup>, equipped with a CCD (256 x 1024 pixels) detector cooled at -70°C. The spectra were collected by using two laser sources: a 532 nm line of a diode laser, with an emitted power of 50 mW and a 633 nm line of He-Ne laser

with an emitted power of 17 mW power, equipped with edge/notch filters. The solutions have been characterized by using the 4× and 20× Mplan Olympus objectives while the films have been characterized by using the 50x Mplan Olympus objective, focusing a laser spot of about 1  $\mu\text{m}$  of apparent diameter. To avoid structural changes due to laser heating, a 0.3-OD filter has been used to collect Raman spectra: the actual intensity of the transmitted radiation is 50% of the intensity of the laser emitted radiation.

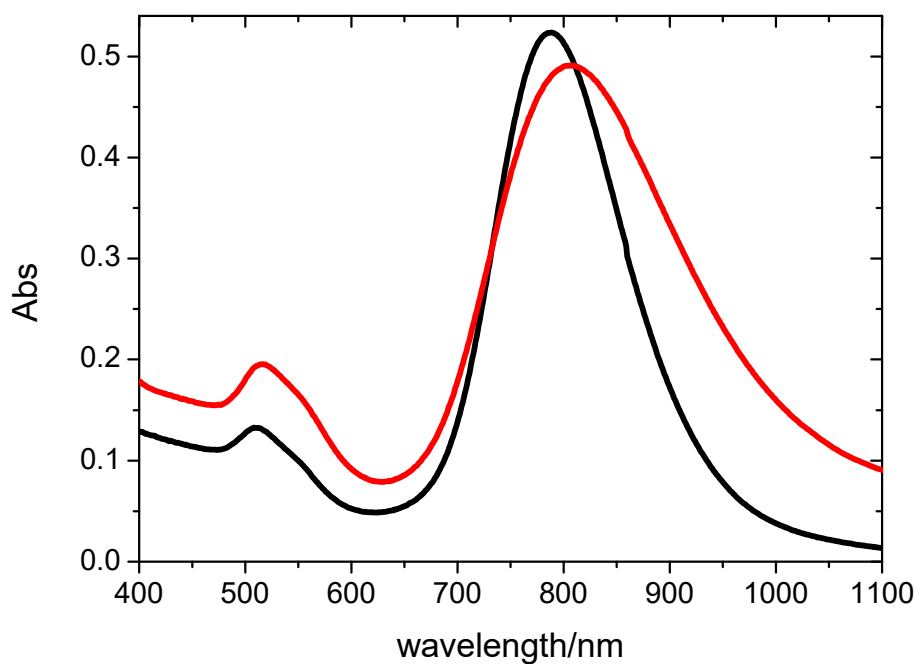

**Figure S1.** Extinction spectrum of AuNR<sub>CTAB</sub> in water (black line) and of AuNR<sub>PEG-SH</sub> in dichloromethane (red line).

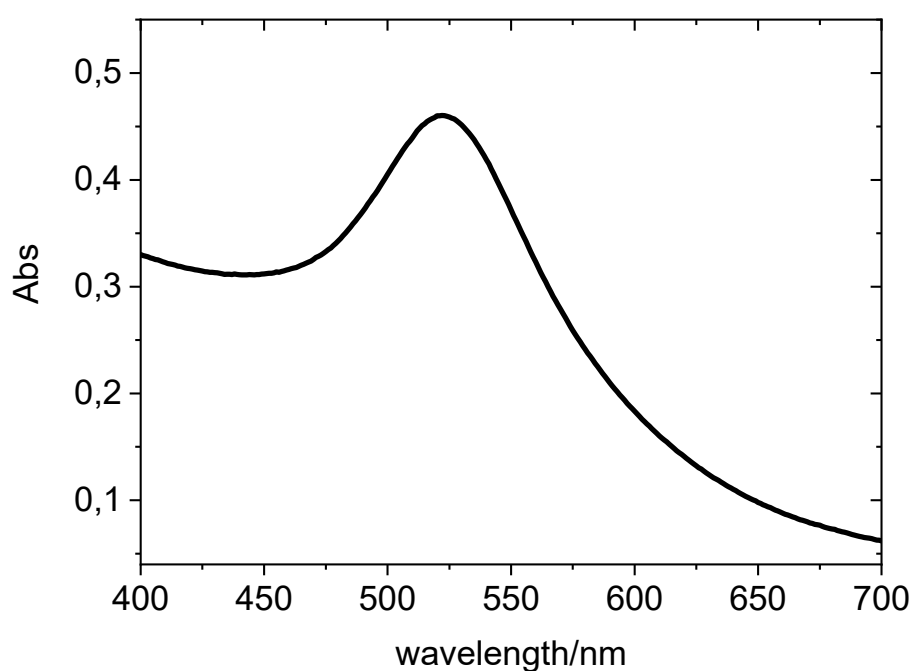

**Figure S2.** Extinction spectrum of AuNS<sub>SC</sub> in water.

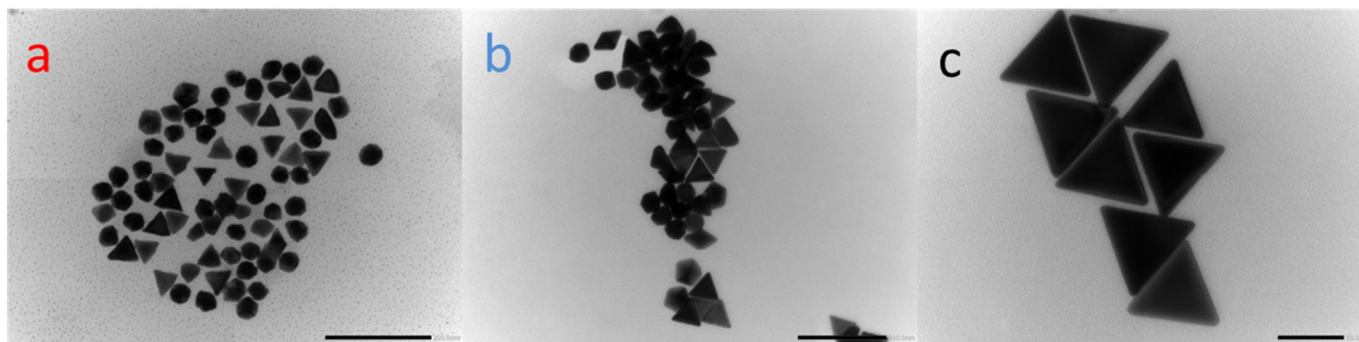

**Figure S3.** TEM images of the obtained nanoparticles (see § 2.3 in the main text) before the selective precipitation (a); after precipitation: supernatant (b) and precipitate (c)

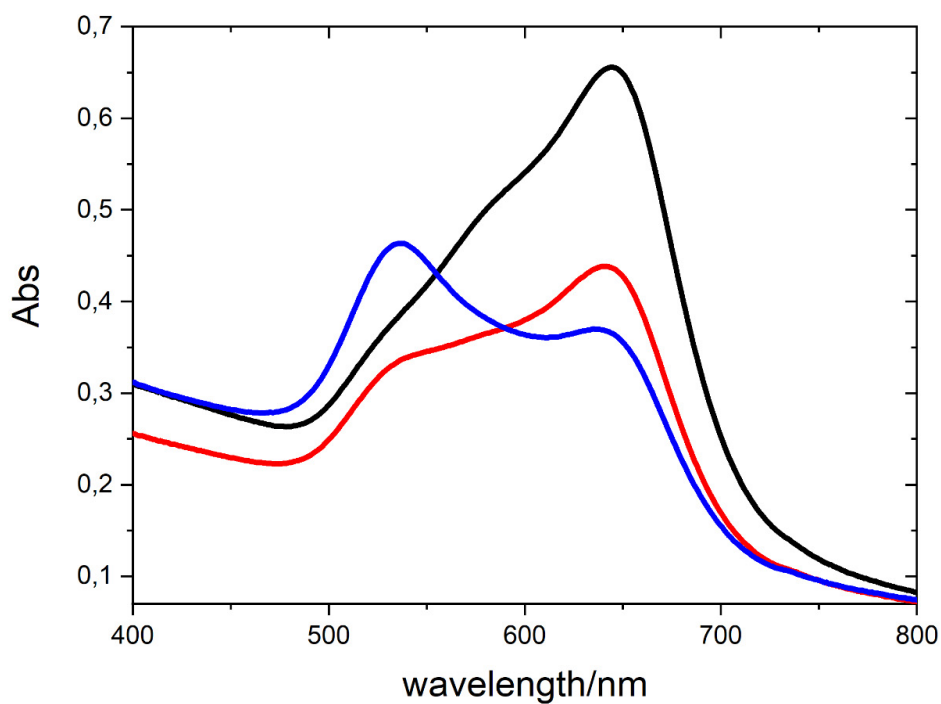

**Figure S4.** Extinction spectra of nanoparticles solutions before the selective precipitation (red line); after precipitation: supernatant (blue line) and precipitate (black line) containing AuNT<sub>CTAC</sub> purified nanoparticles (see Figure S3 for the correspondent TEM image).

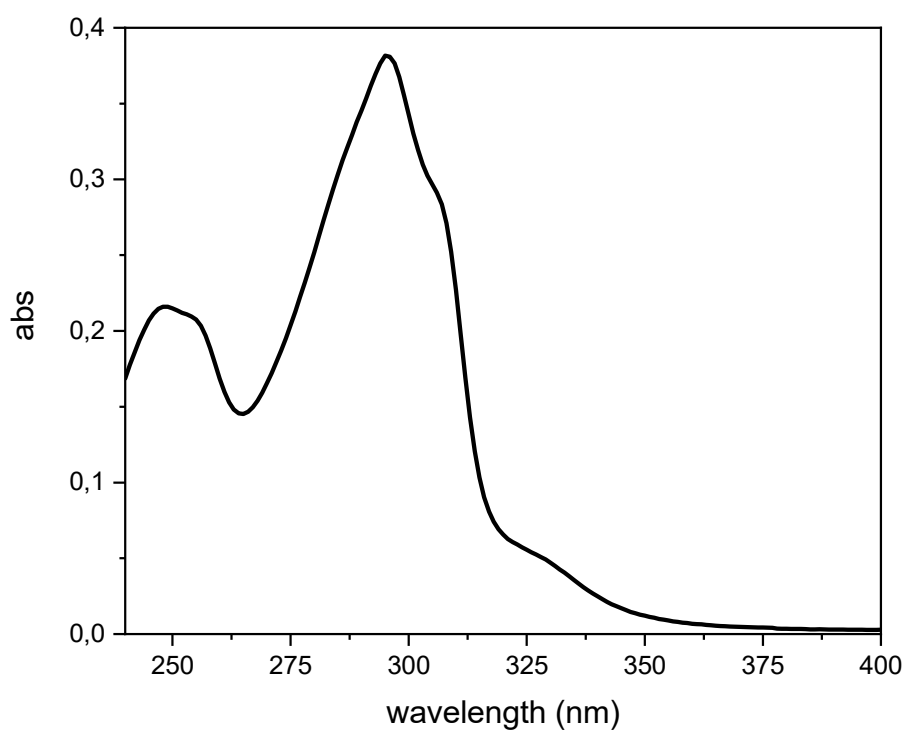

**Figure S5.** Absorption spectrum of Bpy-SH in diluted dichloromethane solution ( $1.3 \times 10^{-5}$  M).

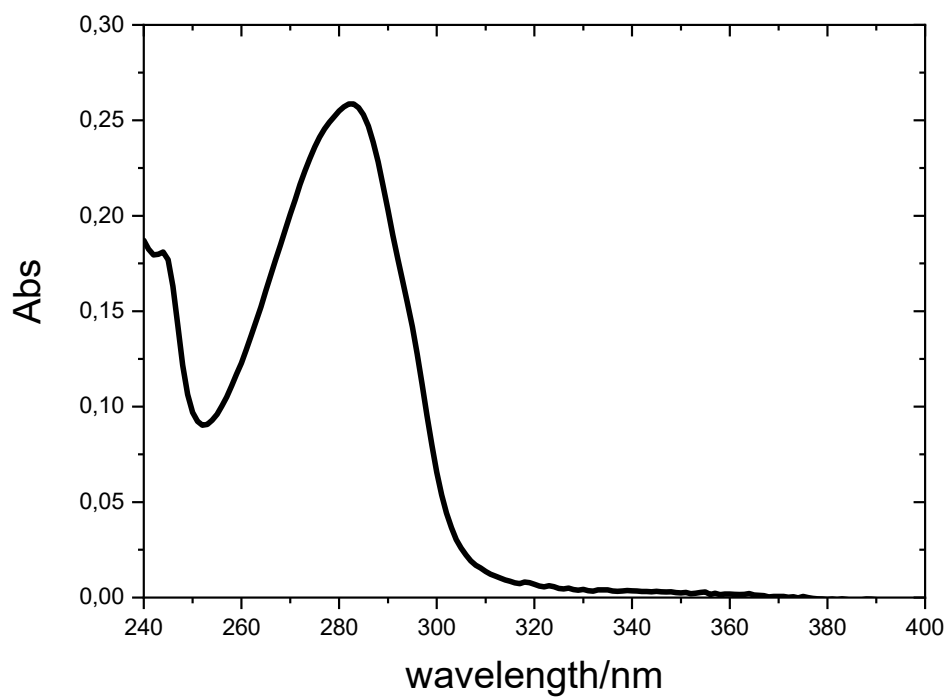

**Figure S6.** Absorption spectrum of 2,2'-bipyridine in diluted dichloromethane solution ( $1.3 \times 10^{-5}$  M).

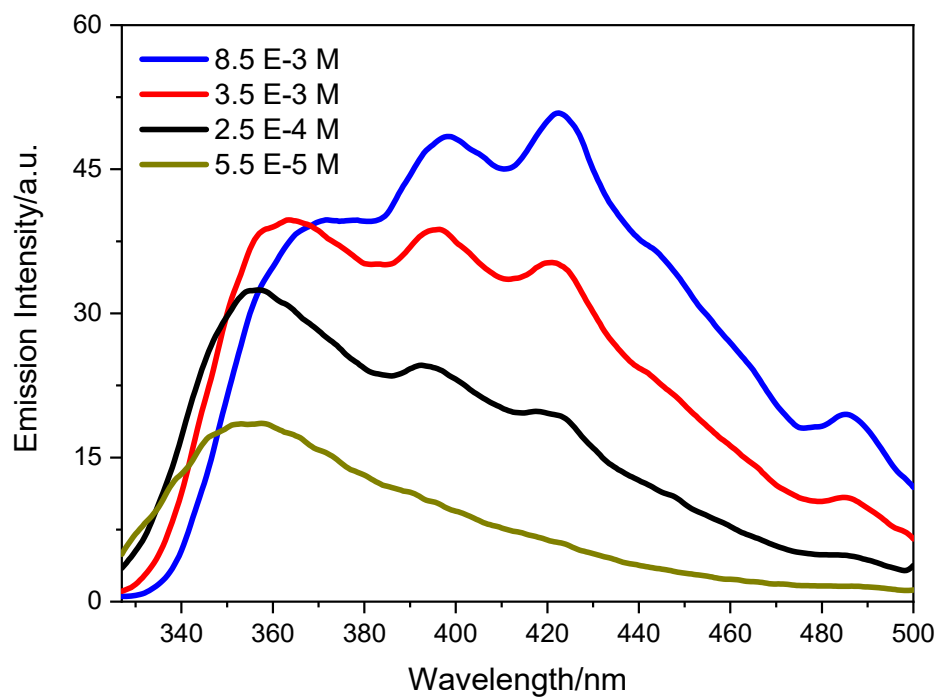

**Figure S7.** Emission spectra of Bpy-SH dichloromethane solutions at various concentrations ( $\lambda_{\text{ex}} = 306 \text{ nm}$ )

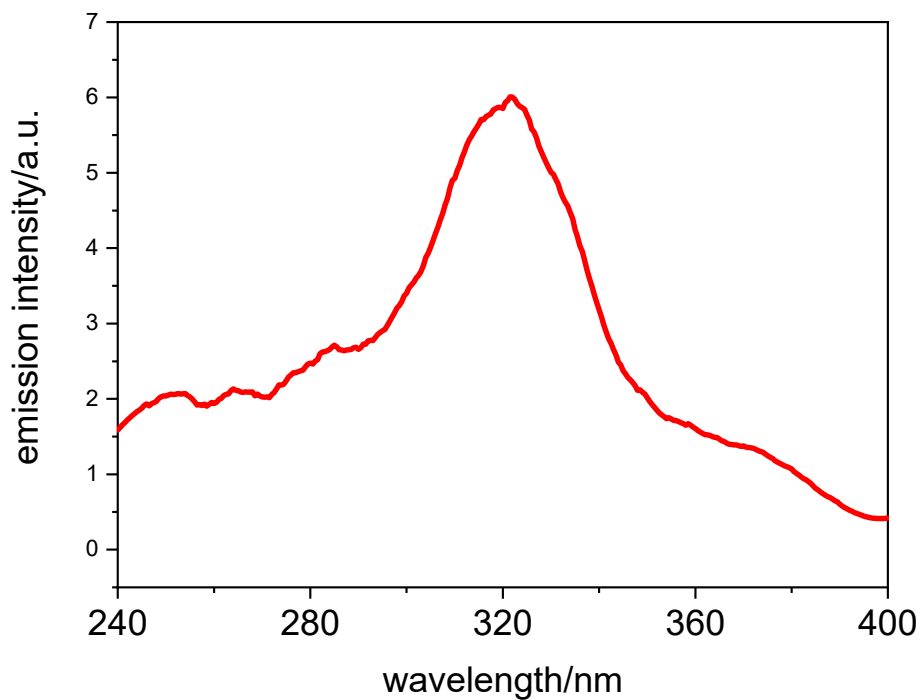

**Figure S8.** Excitation spectrum of **Bpy-SH@AuNR** in water solution ( $\lambda_{\text{em}} = 350 \text{ nm}$ )

The attribution of the Raman modes has been quite difficult, because in literature it has been not possible to find the theoretical Raman spectra of the Bpy-SH with the nitrogen atoms in configuration trans. Anyway, a tentative attribution of the Raman bands shown in the spectra of Figure 2 has been done by comparison with others comparable systems and it has been reported in Table S1.

**Table S1.** Raman modes attribution of Bpy-SH in powder sample.

| Raman mode (cm <sup>-1</sup> )                                         | Assignment [1]                                       | Assignment [2]                                                                                                                             | Assignment [3]                               | Assignment [4]                               |
|------------------------------------------------------------------------|------------------------------------------------------|--------------------------------------------------------------------------------------------------------------------------------------------|----------------------------------------------|----------------------------------------------|
| 392                                                                    |                                                      | Sym Au - $\nu_7$ ring o.p. def (out of plane modes)                                                                                        |                                              |                                              |
| 431                                                                    | $\tau$ (CCCC)16b' (Out of plane Vibration)           | Sym Ag - $\nu_{14}$ interring i.p. bend (In plane modes)                                                                                   |                                              |                                              |
| 462                                                                    | $\beta$ (C'C)15' (In plane Vibration)                |                                                                                                                                            |                                              |                                              |
| 569                                                                    | $\pi$ (CC <sub>a</sub> )10a (Out of plane Vibration) | Sym Bu - $\nu_6$ ring o.p. def+interring o.p. bend+CH o.p. bend (out of plane modes)                                                       |                                              |                                              |
| 631                                                                    | $\beta$ (CCC)6b' (In plane Vibration)                | Sym Ag - $\nu_{13}$ ring i.p. def (In plane modes) + Sym Bu - $\nu_{13}$ ring i.p. def (In plane modes)                                    |                                              |                                              |
| 660                                                                    |                                                      | Sym Bu - $\nu_{15}$ ring i.p. def (out of plane modes)                                                                                     | Ring i.p. def.                               | Ring i.p. def.                               |
| 713                                                                    |                                                      |                                                                                                                                            | Ring breath                                  | Ring breath                                  |
| 777                                                                    | $\tau$ (CCCC)4' (Out of plane Vibration)             | Sym Ag - $\nu_{12}$ ring i.p. def. (In plane modes) + Sym Au - $\nu_5$ ring o.p. def+interring o.p. bend+CH o.p. bend (out of plane modes) |                                              |                                              |
| 793                                                                    |                                                      | Sym Au - $\nu_4$ CH o.p. bend (out of plane modes)                                                                                         |                                              |                                              |
| 843                                                                    | $\beta$ (CCC)12' (In plane Vibration)                | Sym Bg - $\nu_4$ interring o.p. bend+CH o.p. bend (out of plane modes)                                                                     | CH o.p. bend                                 | CH o.p. bend                                 |
| 1020                                                                   |                                                      | Sym Bu - $\nu_{12}$ ring i.p. def + ring str (In plane modes)                                                                              |                                              |                                              |
| 1120                                                                   | $\beta$ (CH)18a' (In plane Vibration)                | Sym Bu - $\nu_8$ CH i.p. bend (In plane modes)                                                                                             | CH i.p. def. + ring str                      | CH i.p. def. + ring str.                     |
| 1216                                                                   |                                                      |                                                                                                                                            |                                              | CH2 Wagging                                  |
| 1241                                                                   | $\nu$ (C-C)19a (In plane Vibration)                  | Sym Ag - $\nu_7$ ring str (In plane modes)                                                                                                 | Inter-ring stretch + ring str. + CH i.p. def | Inter-ring stretch + ring str. + CH i.p. def |
| 1261                                                                   |                                                      | Sym Bu - $\nu_5$ + $\nu_7$ ring str + CH i.p. bend (In plane modes)                                                                        |                                              |                                              |
| 1304                                                                   |                                                      | Sym Ag - $\nu_6$ interring str+ring str+ring i.p. def (In plane modes)                                                                     |                                              |                                              |
| 1323                                                                   |                                                      | Sym Ag - $\nu_5$ CH i.p. bend + interring i.p. bend (In plane modes)                                                                       | Inter-ring str. + ring str. + CH i.p. def.   | Inter-ring str. + ring str. + CH i.p. def.   |
| 1407                                                                   |                                                      | Sym Bu - $\nu_4$ CH i.p. bend + ring str (In plane modes)                                                                                  | CH2 Wagging                                  | CH2 Wagging                                  |
| 1498                                                                   | $\nu$ (C-C)19a (In plane Vibration)                  | Sym Ag - $\nu_3$ CH i.p. bend+ring str (In plane modes)                                                                                    | CH i.p. def. + ring str                      | CH i.p. def. + ring str.                     |
| 1596                                                                   | $\nu$ (C-N)8b (In plane Vibration)                   | Sym Ag - $\nu_1$ ring str (In plane modes)                                                                                                 | Ring str.                                    | Ring str.                                    |
| 2566                                                                   | $\nu$ (S-H) [5]                                      |                                                                                                                                            |                                              |                                              |
| 2937                                                                   | $\nu$ (CH <sub>2</sub> asym) [5]                     |                                                                                                                                            |                                              |                                              |
| i.p., in-plane; o.p., out-of-plane; def, deformation; str, stretching. |                                                      |                                                                                                                                            |                                              |                                              |

The spectra collected on PEG-SH powder is shown in Figure S9 in order to be used as reference for the Raman study performed on the others samples.

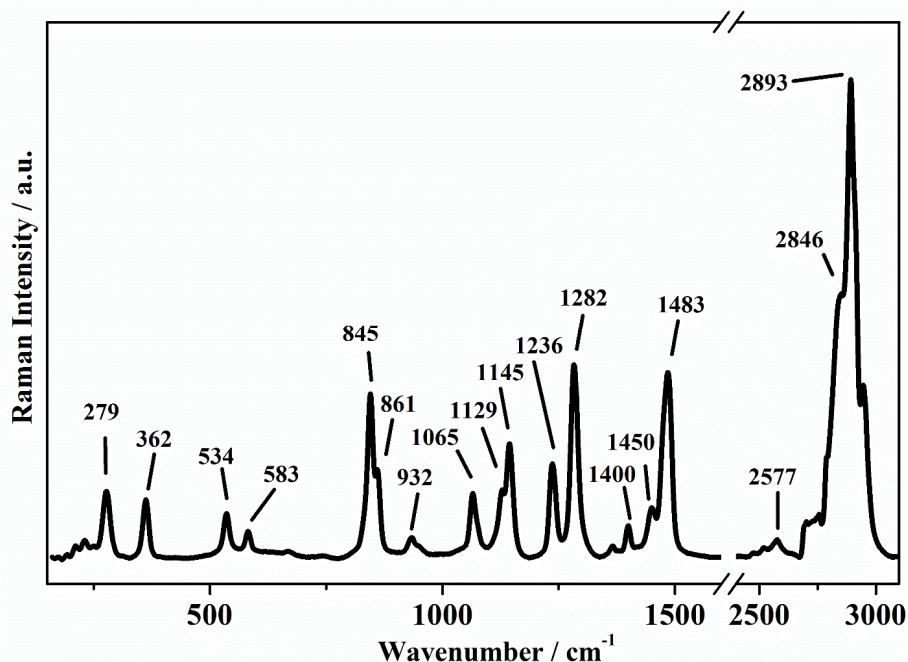

**Figure S9.** Raman spectrum of PEG-SH in powder sample collected in the ranges between 150 and 1600  $\text{cm}^{-1}$  and between 2400 and 3100  $\text{cm}^{-1}$  (laser source at 532 nm)

In table S2 is reported the assignment of each Raman band of the spectra of figure S9 collected on the PEG-SH powder. Such assignment has been done by comparison with similar substance since it was not possible to find a theoretical spectrum of the Polyethylene glycol 2-mercaptoethyl methyl ether (PEG-SH). Nevertheless, the attribution fit very well with the experimental spectrum.

**Table S2.** PEG-SH Raman modes and their attribution.

| Raman mode ( $\text{cm}^{-1}$ ) | Assignment [6]                                                                    |
|---------------------------------|-----------------------------------------------------------------------------------|
| 279                             | Sym $A_1$ ; $\delta$ (COC) <sub>i</sub> , $\delta$ (COC)                          |
| 362                             | Sym $E_1$ ; $\delta$ (COC) <sub>0</sub> , $\delta$ (OCC) <sub>i</sub>             |
| 534                             | Sym $E_1$ ; $\delta$ (OCC) <sub>0</sub> ,                                         |
| 583                             | Amorphous aggregation state                                                       |
| 845                             | Sym $E_1$ ; r (CH <sub>2</sub> ) <sub>0</sub> ,                                   |
| 861                             | Sym $A_1$ ; r (CH <sub>2</sub> ) <sub>i</sub> , v (CO) <sub>i</sub>               |
| 932                             | Amorphous aggregation state                                                       |
| 1065                            | Sym $E_1$ ; r (CH <sub>2</sub> ) <sub>i</sub> , v (CO) <sub>i</sub>               |
| 1129                            | Sym $A_1$ ; v (CC), $\omega$ (CH <sub>2</sub> )                                   |
| 1145                            | Sym $A_1$ ; v (CO) <sub>0</sub> ,                                                 |
| 1236                            | Sym $E_1$ ; t (CH <sub>2</sub> ) <sub>i</sub> , t (CH <sub>2</sub> ) <sub>0</sub> |
| 1282                            | Sym $E_1$ ; t (CH <sub>2</sub> ) <sub>i</sub> , t (CH <sub>2</sub> ) <sub>0</sub> |
| 1400                            | Sym $A_1$ ; $\omega$ (CH <sub>2</sub> ) <sub>i</sub> , v (CC),                    |
| 1450                            | Sym $E_1$ ; $\delta$ (CH <sub>2</sub> ) <sub>i</sub> ,                            |
| 1483                            | Sym $A_1$ ; $\delta$ (CH <sub>2</sub> ) <sub>i</sub> ,                            |
| 2577                            | v (S-H stretching) [5,7]                                                          |
| 2846                            | v (CH <sub>2</sub> stretching) [5,7,8]                                            |
| 2893                            | v (CH <sub>2</sub> stretching) [5,7,8]                                            |

Raman spectra have been collected also on gold nanorods functionalized by PEG-SH dispersed in water (AuNR<sub>PEG-SH</sub>). In figure S10 it is shown the Raman spectra collected on AuNR<sub>PEG-SH</sub> by the laser source at 532nm in the ranges between 200 and 1800  $\text{cm}^{-1}$  and between 2500 and 3800  $\text{cm}^{-1}$ .

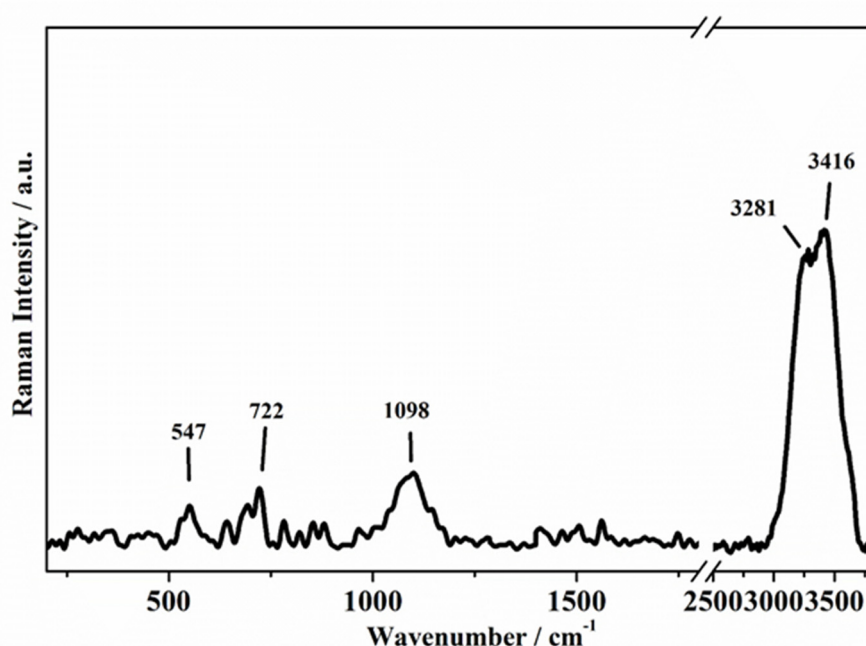

**Figure S10.** Raman spectrum of PEG-SH in powder sample collected in the ranges between 150 and 1600  $\text{cm}^{-1}$  and between 2400 and 3100  $\text{cm}^{-1}$  (laser source at 532 nm)

As it is possible to see in figure S10, there are many small Raman bands that fall below 1200  $\text{cm}^{-1}$  which can be assigned to the PEG-SH. The typical Raman bands of the cetyltrimethylammonium bromide (CTAB) [18] at 763  $\text{cm}^{-1}$ , 962  $\text{cm}^{-1}$  and 2847  $\text{cm}^{-1}$  are not detectable. It means that the CTAB has been completely removed during the synthesis of the AuNR<sub>PEG-SH</sub> samples [19-22]. The others two bands at 3281  $\text{cm}^{-1}$  and 3416  $\text{cm}^{-1}$  (Figure S10) are assigned to the O-H stretching of the solvent H<sub>2</sub>O [23].

## References

1. Kühnle, A. Self-Assembly of Organic Molecules at Metal Surfaces. *Curr. Opin. Colloid Interface Sci.* **2009**, *14*, 157–168.
2. Chaki, N.K.; Vijayamohan, K. Self-Assembled Monolayers as a Tunable Platform for Biosensor Applications. *Biosens. Bioelectron.* **2002**, *17*, 1–12.
3. Motealleh, A.; Dorri, P.; Kehr, N.S. Self-Assembled Monolayers of Chiral Periodic Mesoporous Organosilica as a Stimuli-Responsive Local Drug Delivery System. *J. Mater. Chem. B* **2019**, *7*, 2362–2371.
4. Gankin, A.; Mervinetsky, E.; Alshanski, I.; Buchwald, J.; Dianat, A.; Gutierrez, R.; Cuniberti, G.; Sfez, R.; Yitzchaik, S. ITO Work Function Tunability by Polarizable Chromophore Monolayers. *Langmuir* **2019**, *35*, 2997–3004.
5. Love, J.C.; Estroff, L.A.; Kriebel, J.K.; Nuzzo, R.G.; Whitesides, G.M. Self-Assembled Monolayers of Thiolates on Metals as a Form of Nanotechnology. *Chem. Rev.* **2005**, *105*, 1103–1170.
6. Laibinis, P.E.; Whitesides, G.M.; Allara, D.L.; Tao, Y.T.; Parikh, A.N.; Nuzzo, R.G. Comparison of the Structures and Wetting Properties of Self-Assembled Monolayers of n-Alkanethiols on the Coinage Metal Surfaces, Copper, Silver, and Gold. *J. Am. Chem. Soc.* **1991**, *113*, 7152–7167.
7. Heister, K.; Allara, D.L.; Bahnck, K.; Frey, S.; Zharnikov, M.; Grunze, M. Deviations from 1:1 Compositions in Self-Assembled Monolayers Formed from Adsorption of Asymmetric Dialkyl Disulfides on Gold. *Langmuir* **1999**, *15*, 5440–5443.
8. Hamoudi, H.; Esaulov, V.A. Selfassembly of  $\alpha,\omega$ -Dithiols on Surfaces and Metal Dithiol Heterostructures. *Ann. Phys.* **2016**, *528*, 242–263.
9. F. Scarpelli, A. Ionescu, L. Ricciardi, P. Plastina, I. Aiello, M. La Deda, A. Crispini, M. Ghedini, N. Godbert, A novel route towards water-soluble luminescent iridium(III) complexes via a hydroxy-bridged dinuclear precursor, *Dalton Trans.*, **2016**, *45*, 17264–17273.

10. P. F. Liguori, M. Ghedini, M. La Deda, N. Godbert, F. Parisi, R. Guzzi, A. Ionescu, I. Aiello, Electrochromic behaviour of Ir(III) bis-cyclometalated 1,2-dioxolene tetra-halo complexes: fully reversible catecholate/semiquinone redox switches. *Dalton Transactions* 2020, 49, 2628–2635.
11. A. Ionescu, R. Caligiuri, N. Godbert, A. Candreva, M. La Deda, E. Furia, M. Ghedini, I. Aiello, New electropolymerizable Ir(III) complexes with  $\beta$ -ketoiminate ancillary ligands. *Chemistry - An Asian Journal* 2019, 14, 3025–3034.
12. T. Mutai, J. D. Cheon, G. Tsuchiya, K. Araki, Tuning of fluorescence properties of aminoterpyridine fluorophores by N-substitution. *Journal of the Chemical Society. Perkin Transactions 2* 2002, 2, 862–865.
13. O. Poizat, G. Buntinx, P. Valat, V. Wintgens, M. Bridoux, Photochemistry of 4,4'-Bipyridine. Nanosecond Absorption and Raman Study of the Hydrogen Atom Abstraction from Methanol and 2-Propanol *Journal of Physical Chemistry* 1993, 97, 5905–5910.
14. J. Kumar, R. Thomas, R. S. Swathi, K. G. Thomas, Au nanorod quartets and Raman signal enhancement: towards the design of plasmonic platforms *Nanoscale* 2014, 6, 10454–10459.
15. X. Gao, Reproducibility in Surface-Enhanced Raman Spectroscopy. *Journal of Physical Chemistry* 1990, 94, 6858–6864.
16. T. Yang, H. Long, M. Malkoch, E. K. Gamstedt, L. Berglund, A. Hult, Characterization of Well-Defined Poly(ethylene glycol) Hydrogels Prepared by Thiol-ene Chemistry *Polymer Chemistry*, 2011, 4044–4054.
17. L. Ducasse, M. Dussauze, J. Grondin, J. C. Lassègues, C. Naudin, L. Servant, Spectroscopic study of poly(ethylene oxide)<sub>6</sub> : LiX complexes (X=PF<sub>6</sub> , AsF<sub>6</sub> , SbF<sub>6</sub> , ClO<sub>4</sub>) *Physical Chemistry Chemical Physics*, 2003, 5, 567–574.
18. M. Kertesz, C. H. Choi, S. Y. Hong, Conformational Information from Vibrational Spectra of Polyaniline. *Synthetic Metals* 1997, 85, 1073–1076.
19. Z. Zhang and M. Lin, Fast loading of PEG-SH on CTAB-protected gold nanorods, *RSC Adv.*, 2014, 4, 17760- 17767.
20. Serrano-Montes AB, De Aberasturi DJ, Langer J, et al (2015) A General Method for Solvent Exchange of Plasmonic Nanoparticles and Self-Assembly into SERS-Active Monolayers. *Langmuir* 31:9205–9213. <https://doi.org/10.1021/acs.langmuir.5b01838>
21. Yüce M, Kurt H (2017) How to make nanobiosensors: Surface modification and characterisation of nanomaterials for biosensing applications. *RSC Adv* 7:49386–49403. <https://doi.org/10.1039/c7ra10479k>
22. Conde J, Dias JT, Grazú V, et al (2014) Revisiting 30 years of biofunctionalization and surface chemistry of inorganic nanoparticles for nanomedicine. *Front Chem* 2:1–27. <https://doi.org/10.3389/fchem.2014.00048>
23. A. V. Whitney, R. P. Van Duyne and F. Casadio, An innovative surface-enhanced Raman spectroscopy (SERS) method for the identification of six historical red lakes and dyestuffs, *J. Raman Spectrosc.*, 2006, 37, 993–1002.
